# Supplementary material
Source: PubMed Central journal article supplement (PMC1798186)
Supplement: annrheumd_ard.2005.045641_1.pdf [file annrheumd_ard.2005.045641_1.pdf]

# Effetti antinfiammatori di leflunomide in combinazione con metotrexato sulla co-coltura di linfociti T e macrofagi sinoviali da pazienti con artrite reumatoide

M Cutolo, S Capellino, P Montagna, A Sulli, B Serio, B Villaggio

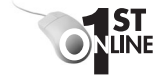

Ann Rheum Dis. doi: 10.1136/ard.2005.045641

**Obiettivi:** Valutare gli effetti antinfiammatori del metabolita attivo di leflunomide A771726 (Lef-M) in combinazione con metotrexato (MTX) su macrofagi sinoviali (MS) di pazienti affetti da artrite reumatoide (AR) in co-coltura con una linea attivata di cellule T (linea cellulare Jurkat).

**Metodi:** I livelli di citochine pro-infiammatorie (TNF $\alpha$ , IL1 $\beta$ , IL6), della molecola di adesione intracellulare ICAM-1, delle isoforme della ciclossigenasi (COX1 e COX2) e del fattore nucleare  $\kappa$ B (NF- $\kappa$ B) sono stati analizzati nei MS in co-coltura con una linea di cellule T; l'espressione proteica intracellulare è stata valutata mediante tecniche immunocitochimiche (ICC) e Western blot, l'espressione proteica extracellulare mediante test ELISA e l'espressione dell'mRNA mediante trascrittasi inversa-PCR multiplex (RT-MPCR) dopo trattamento con Lef-M (1, 10, 30  $\mu$ mol/L) sola o in combinazione con MTX (50 ng/ml).

**Risultati:** La diminuzione intracellulare più significativa delle citochine è stata osservata mediante ICC in MS trattati con la combinazione di Lef-M (1, 10, 30  $\mu$ mol/L) e MTX (50 ng/ml) *versus* MS non trattati (rispettivamente: TNF $\alpha$  29%, 37%, 49%; IL1 $\beta$  56%, 43%, 50% e IL6 59%, 62%, 71%). Mediante ELISA, è stata inoltre confermata una diminuzione significativa dei livelli di citochine nel terreno di coltura di MS trattati con la combinazione Lef-M+MTX (rispettivamente: TNF $\alpha$  40%, 41%, 44%; IL1 $\beta$  10%, 20%, 60%; IL6 37%, 41%, 49%). I dati di Western blot e RT-PCR hanno confermato questi risultati. Dopo trattamento con Lef-M+MTX è stata osservata una diminuzione dell'espressione di ICAM-1, COX1, COX2 e del complesso NF- $\kappa$ B.

**Conclusioni:** La combinazione di MTX e Lef-M dimostra effetti inibitori additivi sulla produzione di mediatori infiammatori da parte di MS in co-coltura con una linea cellulare T attivata. Queste osservazioni potrebbero sostenere i risultati positivi ottenuti in studi clinici sulla terapia di combinazione Leflunomide-Metotrexato per l'AR.

Affiliazioni degli autori al termine dell'articolo

Indirizzo per la corrispondenza:  
Professor Maurizio Cutolo,  
Laboratorio di Ricerca e  
Divisione di Reumatologia,  
Dipartimento di Medicina  
Interna. Università degli  
Studi di Genova,  
Viale Benedetto XV,  
6 - 16132 Genova,  
Italia; mcutolo@unige.it

Accettato il 24 ottobre  
2005; **prima pubblicazione**  
**on-line: 3 novembre 2005**

La migrazione di linfociti e monociti attivati nel tessuto sinoviale di soggetti con artrite reumatoide (AR) è il primo stadio nell'infiammazione sinoviale, al quale fa seguito la degradazione delle articolazioni.<sup>1, 2</sup> La progressione dalla fase G1 alla fase S del ciclo cellulare di questi linfociti e monociti necessita un aumento della sintesi *de novo* delle pirimidine.<sup>3</sup> Leflunomide (Lef) (N-(4-trifluoro-metilfenil)-5-metilisoxazolo-4-carboxamide), soprattutto attraverso il suo metabolita attivo A771726 (Lef-M), a basse dosi terapeutiche inibisce in maniera reversibile l'enzima diidro-orotato deidrogenasi (DHODH), che rappresenta il fattore limitante nella sintesi *de novo* delle pirimidine in differenti linee cellulari.<sup>4</sup>

Studi recenti suggeriscono, tuttavia, che gli effetti antinfiammatori esercitati dal Lef-M sono anche fortemente correlati alla sua capacità di inibire l'osteoclastogenesi come pure la produzione di metalloproteinasi e di citochine infiammatorie da parte di cellule sinoviali in coltura di pazienti con AR e di inibire l'attivazione da contatto cellula-cellula tra linfociti T e monociti.<sup>5-7</sup>

Inoltre, ulteriori studi indicano che Lef-M sembra interferire con l'attivazione del complesso del fattore nucleare  $\kappa$ B (NF- $\kappa$ B) e ridurre la glicosilazione delle molecole di adesione quali ICAM-1.<sup>8-10</sup>

Recentemente, è stato osservato che in pazienti con AR, il Lef-M, inibendo la DHODH, influenza la migrazione trans-endotheliale di cellule mononucleate da sangue periferico (PBMC) e diminuisce i processi legati all'adesione cellulare, come l'espressione del CD44 nei monociti e il legame PBMC-

ialuronano.<sup>11</sup> Tutti questi effetti potrebbero agire insieme a bloccare l'attivazione e il traffico cellulare nel tessuto sinoviale artritico.

Tuttavia, data l'elevata incidenza di insuccessi della monoterapia dell'AR e la natura multifattoriale della patogenesi, vengono sempre più spesso prescritte combinazioni di diversi farmaci in modo da inibire i complessi processi alla base della malattia. In particolare, è stata dimostrata l'utilità della Lef in combinazione con metotrexato (MTX) nel trattamento del paziente con AR.<sup>12-14</sup>

MTX è il più utilizzato tra i farmaci antireumatici in grado di modificare il decorso della malattia nell'AR; esso agisce inibendo la diidrofolato reductasi e, quindi, la sintesi delle purine, diminuendo la disponibilità di folati ridotti.<sup>15</sup> Numerosi effetti antinfiammatori esercitati dal MTX sembrano essere correlati all'induzione dell'aumento dell'adenosina extracellulare e alla sua interazione con specifici recettori cellulari di membrana, con conseguente inibizione della produzione di IL8 da parte delle PBMC, della secrezione di IL6 da parte dei monociti, della sintesi di

**Abbreviazioni:** DHODH, diidro-orotato deidrogenasi; DPBS, soluzione salina Dulbecco tamponata con fosfato; DRMRI, imaging dinamico di risonanza magnetica con gadolinio; ICC, immunocitochimica; Lef, leflunomide; Lef-M, metabolita della leflunomide; MCP-1, chemochina di derivazione monocitaria; MDC-1, chemochina di derivazione macrofagica; MTX, metotrexato; NF- $\kappa$ B, fattore nucleare  $\kappa$ B; PBMC, cellule mononucleate da sangue periferico; AR, artrite reumatoide; RT-MPCR, trascrittasi inversa-PCR multiplex; DS, deviazione standard; MS, macrofagi sinoviali.

leucotriene B4 nei neutrofili e diminuzione dell'espressione genica della collagenasi sinoviale.<sup>16</sup> Inoltre, MTX sembra esercitare effetti antinfiammatori e antiproliferativi in particolare sui monociti attivati.<sup>17, 18</sup>

Recentemente, pazienti con AR trattati con una combinazione di MTX e Lef hanno mostrato una riduzione significativa di numerose chemochine fondamentali, inclusa la chemochina di derivazione monocitaria (MCP-1) e quella di derivazione macrofagica (MDC-1).<sup>19</sup> Sono state inoltre riscontrate correlazioni positive tra le riduzioni dei livelli plasmatici di chemochine e le valutazioni dell'esito clinico a seguito della terapia.<sup>19</sup>

È stato quindi deciso di analizzare gli effetti di Lef-M e della sua combinazione con MTX in una co-coltura di una linea attivata di cellule T insieme a macrofagi sinoviali (MS) ottenuti da pazienti con AR. Lo studio è stato focalizzato sulla valutazione dell'espressione dell'mRNA e delle proteine intracellulari ed extracellulari di diversi mediatori del processo infiammatorio, quali le citochine (TNF $\alpha$ , IL1 $\beta$ , IL6), la molecola di adesione ICAM-1, le isoforme della ciclossigenasi (COX1, COX2) e la via dell' NF- $\kappa$ B, come complesso di molecole di trascrizione che modula le risposte cellulari nelle cellule attivate.<sup>20</sup>

## METODI

### Co-coltura di una linea cellulare T e MS

I macrofagi sinoviali sono stati ottenuti da cinque pazienti affetti da AR secondo i criteri dell'*American College of Rheumatology* dell'adulto.<sup>21</sup> Il comitato etico ha approvato lo studio e per tutti i pazienti è stato ottenuto il consenso informato.

La durata media  $\pm$  deviazione standard (DS) della malattia era di  $4 \pm 2$  anni e l'attività della malattia, determinata secondo il punteggio DAS28, era di 4,1. Nessuno dei pazienti era stato trattato con corticosteroidi per via orale o intra-articolare nei 3 mesi precedenti la sinoviectomia terapeutica in artroscopia.

Dopo l'intervento chirurgico di sinoviectomia, i campioni di tessuto sinoviale prelevati sono stati tagliati in piccoli pezzi (2–5 mm), lavati in soluzione salina Dulbecco tamponata con fosfato (DPBS; Sigma-Aldrich, Sigma Chemical Division, Milano, Italia) e incubati con collagenasi (0,75 mg/ml; tipoIV da *Clostridium histolyticum*; Sigma-Aldrich) per 1 ora a 37°C. Il prodotto della digestione enzimatica è stato passato in un filtro da 150 mesh per separare le cellule sinoviali dai frammenti di tessuto. Le cellule sono state quindi lavate per tre volte con DPBS, risospese nel mezzo di coltura RPMI-1640 (Sigma-Aldrich) arricchito con siero bovino fetale al 10% (contenente meno di 0,5 EU/ml di endotossina), 2 mmol/L di L-glutamina, 100  $\mu$ g/ml di streptomina e 100 U/ml di penicillina (Sigma-Aldrich). Le cellule sinoviali sono state seminate in piastre multipozzetto a fondo piatto (5 $\times$ 10<sup>5</sup> cellule/pozzetto) e incubate a 37°C in atmosfera umidificata contenente il 5% di CO<sub>2</sub>. La vitalità delle cellule (95–97%) è stata valutata mediante colorazione con trypan blue (escludendo le cellule colorate). Dopo 1 ora, le cellule non aderenti sono state eliminate mediante lavaggi, mentre quelle aderenti (MS) sono state messe in co-coltura per 24 ore in transwell (Corning-Costar, Acton, MA, USA) insieme a una linea di cellule T (Jurkat) precedentemente attivate con concanavalina-A (1  $\mu$ g/ml) per 20 ore, in assenza o in presenza di differenti concentrazioni (1, 10, 30  $\mu$ mol/L) di A771726 (Aventis Pharma Deutschland, Francoforte sul Meno, Germania). Le co-culture (linea di cellule T + macrofagi) sono state trattate anche con tre differenti concentrazioni di Lef-M (1, 10, 30  $\mu$ mol/L) in combinazione con MTX (50 ng/ml).

Le concentrazioni di Lef-M utilizzate erano simili ai livelli sierici di questa molecola presenti nei pazienti con AR trattati con dosi terapeutiche di farmaco.<sup>10</sup> La dose di MTX (50 ng/ml) era stata già determinata come la concentrazione raggiungibile nel siero di pazienti con AR trattati con una bassa dose di MTX.<sup>17, 18</sup> Tuttavia, la capacità delle cellule in coltura di assorbire il MTX potrebbe essere sottostimata quando gli studi vengono condotti in un mezzo di coltura con alte concentrazioni di acido folico.

Alla fine del periodo di incubazione della co-coltura, la linea di cellule T Jurkat è stata rimossa con numerosi lavaggi in PBS e i MS sono stati raccolti, lavati in PBS e utilizzati per i diversi test. Gli esperimenti sono stati condotti in triplicato: ciascun esperimento, condotto con MS ottenuti da un singolo paziente, è stato ripetuto tre volte.

### Test immunocitochimico

I macrofagi sono stati raccolti dalle piastre e incubati su vetrini per 45 minuti a 4°C. Le cellule sono state quindi fissate in acetone per 30 secondi, asciugate all'aria e conservate a –20°C fino al loro uso. Dopo reidratazione in PBS, le cellule sono state incubate con siero normale di coniglio per 20 minuti per prevenire legami anticorpali non specifici. Successivamente, le cellule sono state incubate con anticorpi anti-TNF $\alpha$  (lotto no. C161), IL1 $\beta$  (lotto no. J100), IL6 (lotto no. G170) e ICAM-1 (lotto no. C221), diluiti 1:100 (Santa Cruz Biotechnology, Santa Cruz, CA, USA) a temperatura ambiente per 45 minuti.

Gli anticorpi legati sono stati poi evidenziati con anticorpi biotinilati universali (pan-specifici) e, successivamente, con streptavidina perossidasi (Vector Laboratories, Burlingame, CA, USA). A ciascun passaggio sono seguiti due lavaggi in PBS. La reazione di colorazione ha utilizzato diaminobenzidina come cromogeno (Ylem, Roma, Italia). Infine, i vetrini sono stati colorati con ematossilina, fissati con etanolo e montati con Eukitt. I vetrini di controllo sono stati trattati in maniera identica, salvo che sono stati omessi gli anticorpi primari.

### Analisi delle immagini

L'analisi delle immagini è stata condotta con il sistema Leica Q-Win (Leica, Cambridge, UK). Per ciascun campione sono state analizzate circa 100 cellule; i pixel/ $\mu$ m<sup>2</sup> (area positiva) sono stati quantificati mediante il software del sistema. Le singole cellule sono state scelte in modo casuale dagli operatori mediante l'apposito cursore, successivamente l'area positiva è stata misurata automaticamente.

### Test immuno-enzimatico

Dopo 24 ore dal trattamento il mezzo di coltura è stato raccolto e conservato a –20°C fino all'analisi. Il test immuno-enzimatico per la determinazione quantitativa di TNF $\alpha$ , IL1 $\beta$  e IL6 è stato condotto su un sistema a micropiastre (Diacnone, Besançon, Francia) (CV<sub>intra</sub>: 2,15; CV<sub>extra</sub>: 3,85). I risultati sono stati ottenuti con un processore automatico di piastre multipozzetto (Thecno Genetics, Milano, Italia).

### Analisi mediante western-blot

Dopo i diversi trattamenti, i pellets di macrofagi sono stati lisati per 1 ora a 4°C in una soluzione tampone contenente 20 mmol/L Tris-HCl pH 8, 150 mmol/L NaCl, 1 mmol/L fenilmetilsulfonilfluoride, 5 mg/ml aprotinina e 0,5% Nonidet P-40 (Promega, Milano, Italia). I lisati sono stati quindi centrifugati per 10 minuti a 13.000 rpm. I campioni proteici (20  $\mu$ g) sono stati diluiti con soluzione tampone e separati mediante elettroforesi in gel di poliaccrilamide e sodio dodecil solfato al 10%. Le proteine sono state trasferite su membrana di nitrocellulosa Hibond-C (Amersham Pharmacia Biotech

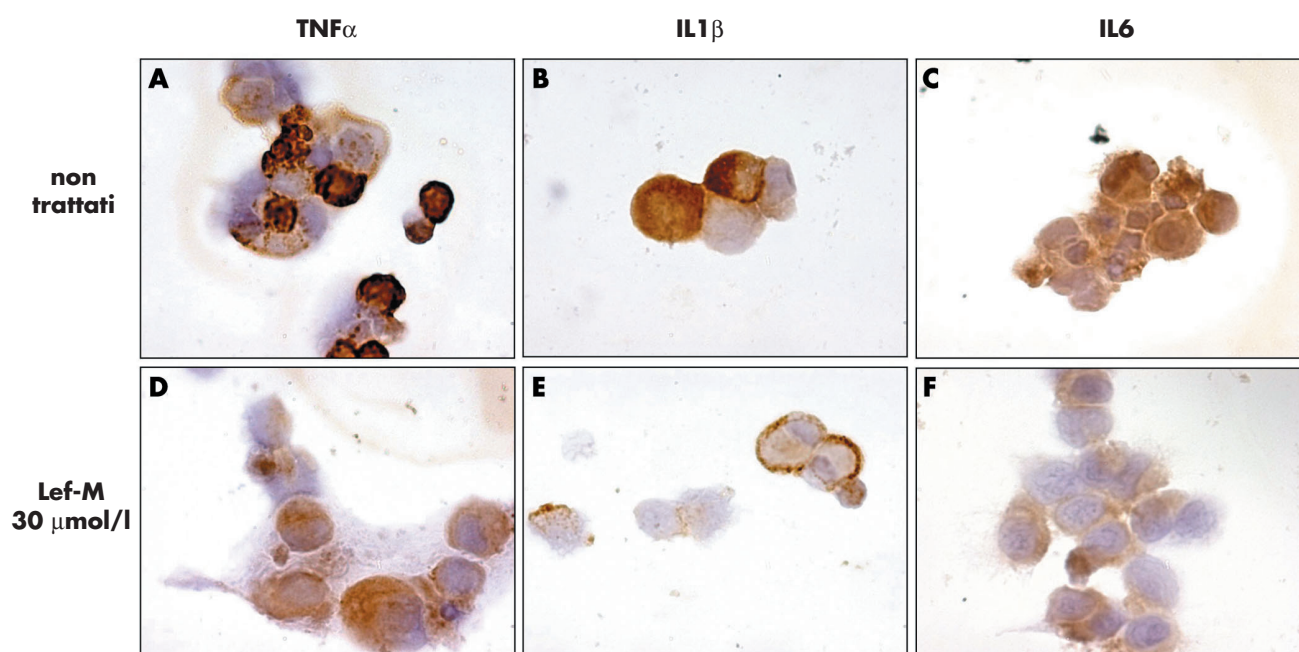

**Figura 1** Rilevazione intracitoplasmatica di TNF $\alpha$ , IL1 e IL6 mediante ICC in una co-cultura di macrofagi sinoviali (MS) non trattati (rispettivamente, A, B e C) e trattati con Lef-M (1, 10, 30  $\mu$ mol/L) (D, E e F). (ingrandimento 100 $\times$ )

Europe, Friburgo, Germania). Dopo il trasferimento, la membrana è stata saturata per 1 ora a temperatura ambiente in PBS contenente latte in polvere magro al 5%.

Per l'immunoblotting, la membrana è stata incubata per una notte a 4°C con anticorpi policlonali anti-TNF $\alpha$ , IL1 $\beta$  e IL6 diluiti 1:500 (Santa Cruz Biotechnology), poi lavata in 0,05% PBS/Tween 20 pH 7,4 ed incubata per 1 ora a temperatura ambiente con anticorpi secondari di capra marcati con perossidasi vegetale (Santa Cruz Biotechnology). Dopo tre ulteriori lavaggi con PBS/Tween, il legame degli anticorpi secondari è stato determinato mediante reazione di chemiluminescenza (Amersham, Pharmacia, Biotech Europe).

### Analisi dell'mRNA

Sono state prelevate aliquote di campioni cellulari dalle diverse condizioni di coltura; poi le cellule sono state lavate due volte in DPBS e lisate con Trizol mRNA per estrarre l'RNA. Tutti i campioni sono stati analizzati mediante trascrittasi inversa-PCR multiplex (RT-MPCR) (RT-MPCR; MBL, Maxim Biotech, San Francisco, CA, USA) per valutare la distribuzione temporale e spaziale dell'mRNA delle diverse citochine (TNF $\alpha$ , IL1 $\beta$ , IL6, IL8, GM-CSF), di COX1 e COX2, delle sub unità p50/p52 dell'NF- $\kappa$ B e degli inibitori dell'NF- $\kappa$ B stesso. Questo metodo è un sistema valido e accurato per determinare l'espressione genica di più geni, usando le stesse condizioni per amplificarli tutti. I *primers* specifici per la PCR, disegnati dalla Maxim Biotech avevano Tm simili e non si appaiavano tra loro all'estremità 3' per aumentare l'amplificazione multipla. I controlli positivi dei prodotti amplificati, 680 bp (TNF $\alpha$ ), 555 bp (IL1 $\beta$ ), 424 bp (GM-CSF), 360 bp (IL6), 300 bp (IL8), 161 bp (TGF $\beta$ ), 278 bp (COX2), 218 bp (COX1), 183 bp (inibitori dell'NF- $\kappa$ B) e 143 bp (p50/p52 dell'NF- $\kappa$ B) possono essere ottenuti da RNA umano o dal controllo positivo incluso nel kit.

### Analisi statistica

I risultati sono stati analizzati mediante test ANOVA non-parametrico (test di Bonferroni) e rappresentano valori medi  $\pm$  DS di cinque esperimenti diversi. Ciascun esperimento, condotto con MS ottenuti da un singolo paziente, è stato ripetuto per tre volte (triplicato).

## RISULTATI

### Effetti di Lef-M da solo o con MTX

Macrofagi sinoviali in co-cultura con una linea attivata di cellule T hanno dimostrato una riduzione significativa nel contenuto di citochine, valutato come espressione proteica intracitoplasmatica mediante immunocitochimica (ICC) dopo trattamento con diverse concentrazioni di Lef-M a (1, 10, 30  $\mu$ mol/L) (figura 1).

Le variazioni osservate, dopo trattamento con 1, 10 e 30  $\mu$ mol/L di Lef-M, includevano una diminuzione dose dipendente del TNF $\alpha$  pari rispettivamente al 13% ( $p < 0,05$ ), al 24% e al 40% ( $p < 0,01$ ); della IL1 $\beta$  pari al 16% ( $p < 0,05$ ), al 39% ( $p < 0,01$ ) e al 58% ( $p < 0,001$ ). Per l'IL6 è stata osservata invece una diminuzione non-dose dipendente pari al 46%, al 43% e al 44% rispettivamente (tutti i  $p < 0,001$ ) rispetto ai controlli (co-cultura senza trattamento) (figura 2A).

Il trattamento combinato con Lef-M e MTX ha determinato un'ulteriore riduzione dell'espressione delle citochine intracitoplasmatiche a livello dei macrofagi (TNF $\alpha$  29% ( $p < 0,05$ ), 37% ( $p < 0,01$ ), 49% ( $p < 0,001$ ); IL1 $\beta$  56%, 43%, 50% (tutti i  $p < 0,001$ ); IL6 59%, 62%, 71% (tutti i  $p < 0,001$ )). In particolare, è stata osservata una diminuzione dose dipendente dell'espressione del TNF $\alpha$ , mentre le diminuzioni di IL1 $\beta$  e IL6 non sono risultate dose dipendenti (figura 2B).

Una diminuzione nella concentrazione di citochine è stata confermata nel mezzo di co-cultura dopo trattamento con Lef-M (a differenti concentrazioni) rispetto alle cellule non trattate (TNF $\alpha$  37% ( $p < 0,01$ ), 28% e 27% ( $p < 0,05$ ); IL1 $\beta$  6% e 8% (NS), 26% ( $p < 0,05$ ); IL6 21% ( $p < 0,05$ ), 29% ( $p < 0,01$ ), 14% (NS)). La riduzione dei livelli di IL1 $\beta$  è risultata dose dipendente, soprattutto alle dosi di 30  $\mu$ mol/L, mentre la diminuzione di TNF $\alpha$  e IL6 è stata molto simile per tutte le concentrazioni di Lef-M (figura 2C). È interessante notare che il trattamento delle co-culture con Lef-M in combinazione con una singola dose di MTX ha indotto un'ulteriore riduzione significativa delle citochine, in particolare per TNF $\alpha$  una riduzione del 40%, 41% ( $p < 0,01$ ) e 44% ( $p < 0,001$ ); per IL1 $\beta$  una riduzione del 10%, 20% ( $p < 0,05$ ) e 60% ( $p < 0,001$ ) e per IL6 una riduzione del 37%, 41% ( $p < 0,01$ ) e 49% ( $p < 0,001$ ) (figura 2D).

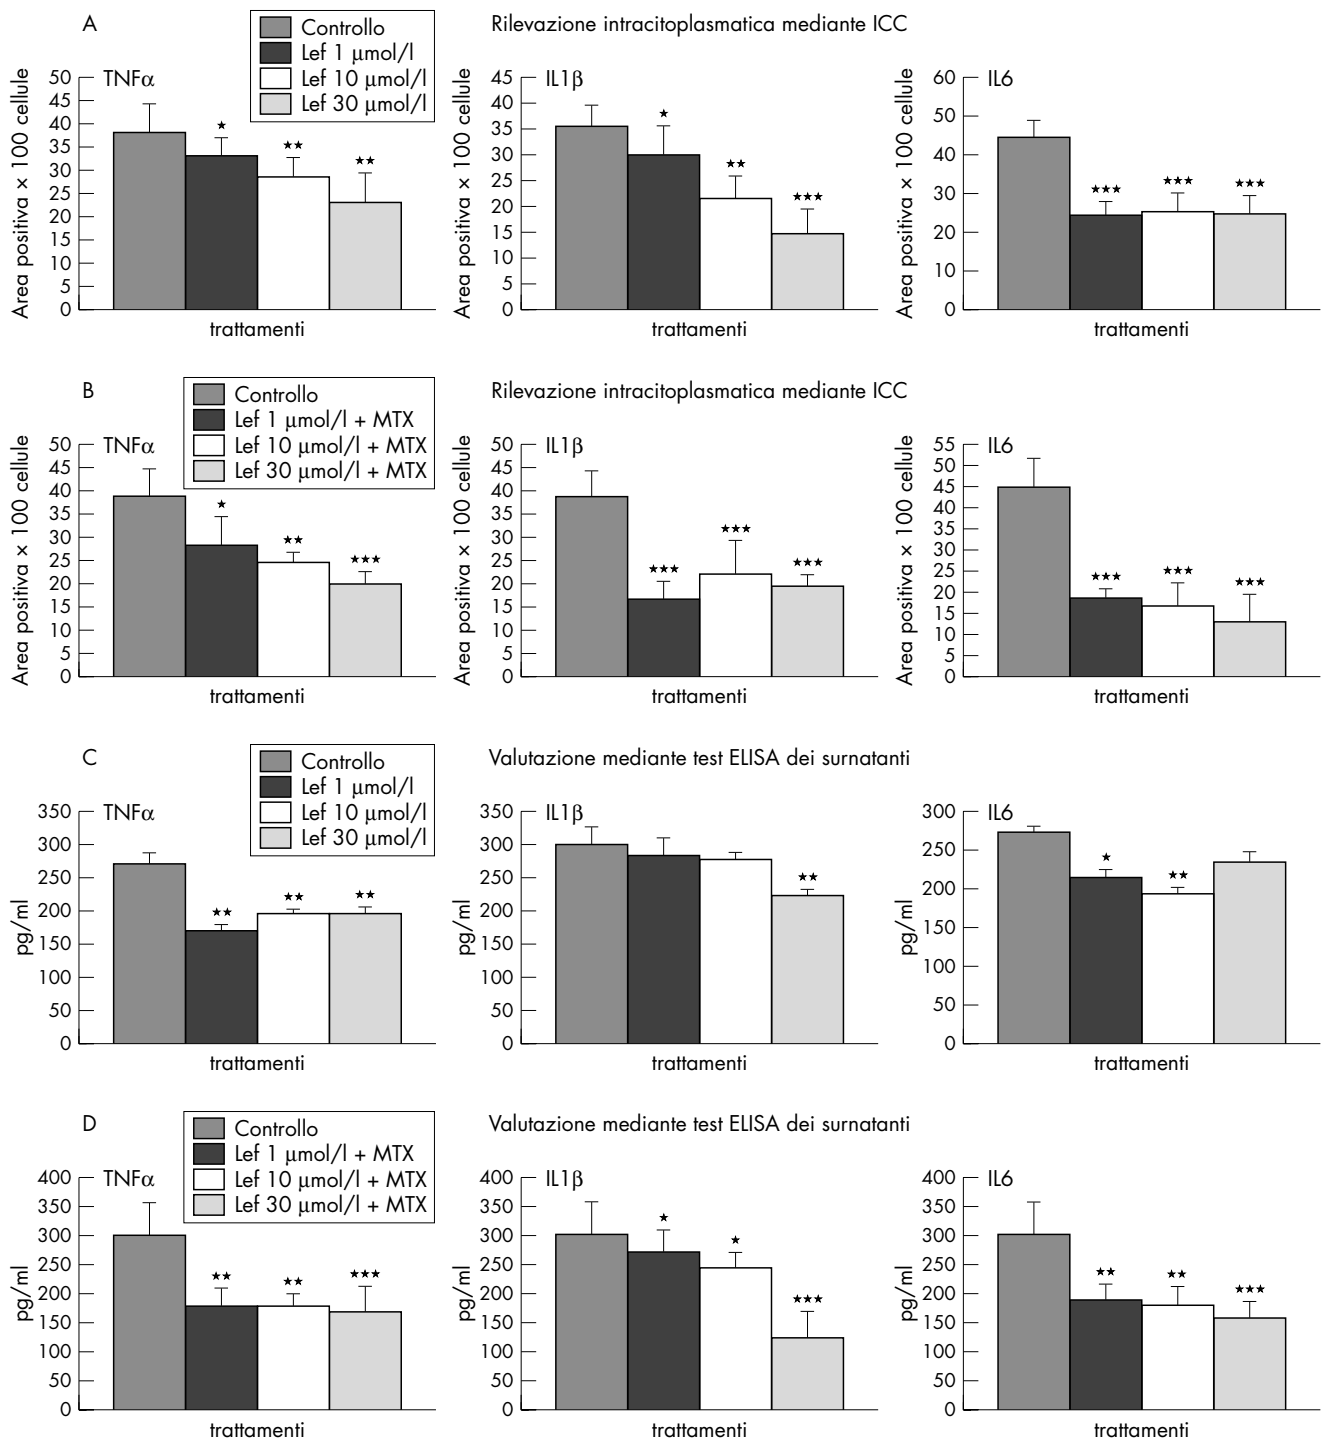

**Figura 2** (A) Analisi di immagini di ICC per la valutazione dell'espressione intracitoplasmatica di TNF $\alpha$ , IL1 $\beta$  e IL6 in una co-cultura di MS trattati con 1, 10 e 30  $\mu$ mol/L Lef-M e MS non trattati (controllo). I risultati sono espressi come media  $\pm$  DS tra diverse popolazioni di macrofagi sinoviali (MS) ottenuti da cinque pazienti con AR. Ciascun esperimento, utilizzando cellule ottenute da un singolo paziente, è stato ripetuto tre volte. \* $p < 0,05$  v controllo; \*\* $p < 0,01$  v controllo; \*\*\* $p < 0,001$  v controllo. (B) Analisi di immagini di ICC per la valutazione dell'espressione intracitoplasmatica di TNF $\alpha$ , IL1 $\beta$  e IL6 in co-culture di MS trattati con Lef-M 1, 10 e 30  $\mu$ mol/L in combinazione con MTX (50 ng/ml) e MS non trattati (controllo). I risultati sono espressi come media  $\pm$  DS tra differenti popolazioni di MS ottenuti da cinque pazienti. Ciascun esperimento, utilizzando cellule ottenute da un singolo paziente, è stato ripetuto tre volte. \* $p < 0,05$  v controllo; \*\* $p < 0,01$  v controllo; \*\*\* $p < 0,001$  v controllo. (C) Valutazione mediante test ELISA dei livelli di TNF $\alpha$ , IL1 $\beta$  e IL6 nei surnatanti di co-culture di MS trattati con Lef-M 1, 10 e 30  $\mu$ mol/L e MS non trattati (controllo). \* $p < 0,05$  v controllo; \*\* $p < 0,01$  v controllo. (D) Valutazione mediante test ELISA dei livelli di TNF $\alpha$ , IL1 $\beta$  e IL6 nei surnatanti di co-culture di MS trattati con Lef-M 1, 10 e 30  $\mu$ mol/L in combinazione con MTX (50 ng/ml) e MS non trattati (controllo). \* $p < 0,05$  v controllo; \*\* $p < 0,01$  v controllo; \*\*\* $p < 0,001$  v controllo.

I risultati ottenuti mediante Western blot hanno confermato, sulla base di analisi densitometriche, la diminuzione dell'espressione delle citochine intracitoplasmatiche sia nelle cellule trattate con solo Lef-M, sia in quelle trattate con Lef-M unitamente a MTX, rispetto alle cellule non trattate; una diminuzione maggiore è risultata evidente nelle cellule

trattate con Lef-M+MTX. I dati sono stati espressi come area e normalizzati rispetto ai controlli (figura 3A,B).

L'analisi comparativa dei dati ottenuti dai test di ICC, Western blot ed ELISA conferma una riduzione della produzione di citochine nei MS trattati in co-cultura con Lef-M in combinazione con MTX.

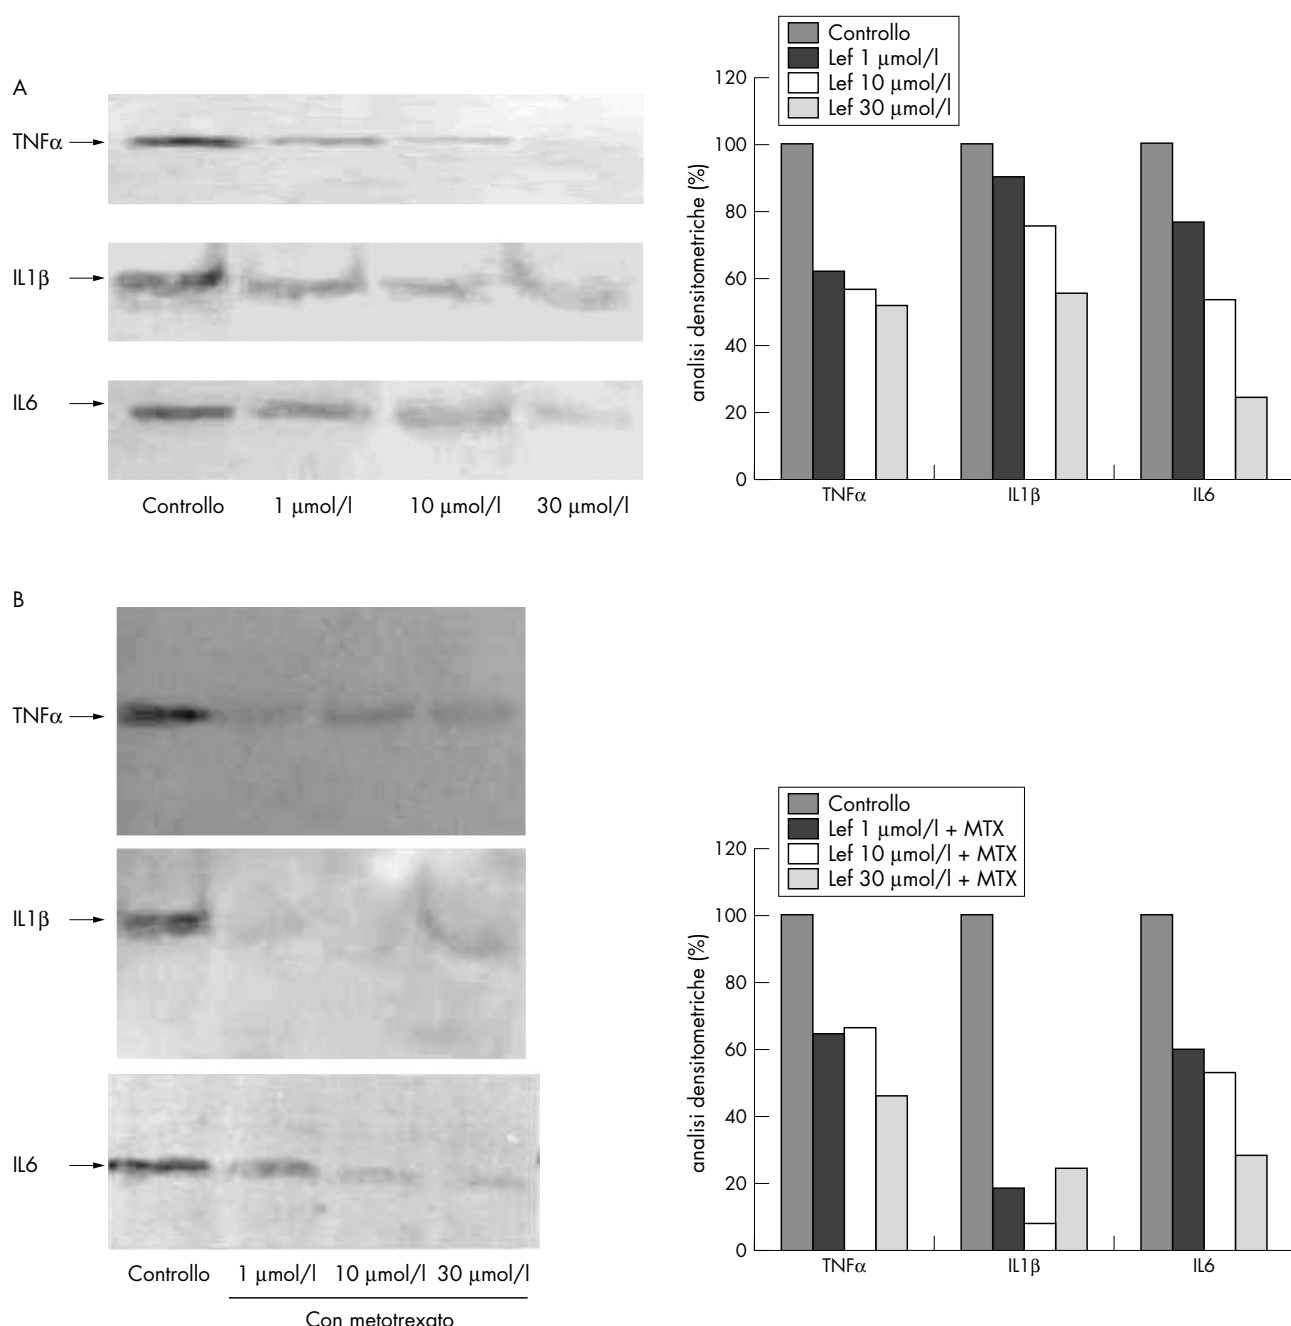

**Figura 3** (A) Analisi Western blot dell'espressione di proteine TNF $\alpha$ , IL1 $\beta$  e IL6 - in co-culture di MS non trattati (controllo) e trattati con Lef-M 1, 10 e 30  $\mu$ mol/L. A destra: analisi densitometriche. (B) Analisi Western blot dell'espressione di proteine TNF $\alpha$ , IL1 $\beta$  e IL6 in co-culture di MS non trattati (controllo) e trattati con Lef-M 1, 10 e 30  $\mu$ mol/L in combinazione con MTX (50 ng/ml). A destra: analisi densitometriche.

### Effetti di Lef-M solo e con MTX sull'espressione dell'mRNA delle citochine

Gli effetti di Lef-M, solo o in combinazione con MTX, sull'espressione dell'mRNA in co-culture di MS sono stati valutati mediante RT-PCR multiplex. Rispetto ai MS non trattati, è stata osservata una diminuzione nell'mRNA per tutte le citochine. L'espressione dell'mRNA è diminuita in maniera non-dose dipendente (figura 4A). È interessante notare che la combinazione di Lef-M e MTX ha determinato un'ulteriore diminuzione evidente dell'espressione dell'mRNA per tutte le citochine analizzate (figura 4B).

### Effetti di Lef-M solo e con MTX sull'espressione della proteina ICAM-1

L'analisi ICC ha dimostrato che, rispetto ai controlli, il trattamento con Lef-M, per tutte le concentrazioni analizzate,

ha determinato una riduzione dell'espressione della proteina ICAM-1. Il trattamento con Lef-M (diverse dosi) in combinazione con MTX (dose unica) ha confermato una diminuzione aggiuntiva più evidente nell'espressione di ICAM-1 (figura 5A-C). Questi dati sono stati confermati dall'analisi per immagini (dati non mostrati).

### Effetti di Lef-M solo e con MTX sull'espressione dell'mRNA di COX1, COX2 e del complesso NF- $\kappa$ B

In questo studio, l'analisi dell'espressione di geni diversi con RT-MPCR ha dimostrato un'evidente diminuzione dose dipendente dell'espressione dell'mRNA di COX nei MS in co-cultura, dopo trattamento con Lef-M (figura 6).

Inoltre, l'espressione dell'mRNA per le subunità p50/p52 dell'NF- $\kappa$ B è scomparsa dopo 24 ore nei MS in co-cultura trattati con tutte le concentrazioni di Lef-M. L'espressione

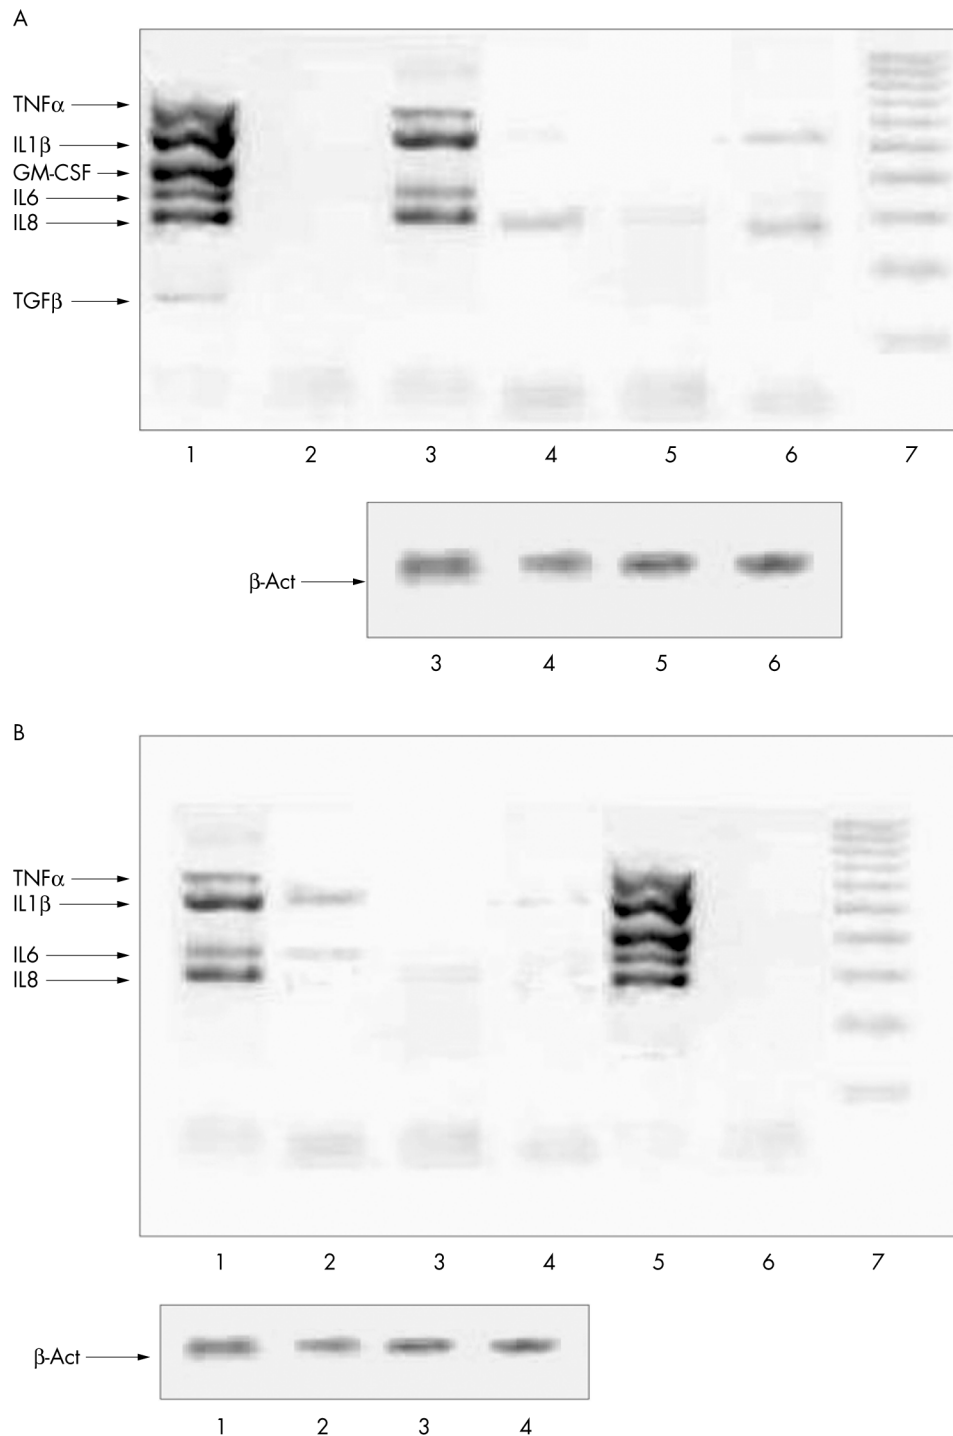

**Figura 4** (A) Espressione dell'mRNA di citochine valutato mediante RT-PCR multiplex. Corsia 1, controllo positivo; corsia 2, controllo negativo; corsia 3, MS non trattati in co-cultura; corsia 4, co-cultura di MS trattati con Lef-M (1  $\mu$ mol/L); corsia 5, con Lef-M (10  $\mu$ mol/L); corsia 6, con Lef-M (30  $\mu$ mol/L); corsia 7, markers per il peso molecolare. In basso: espressione del gene housekeeping per la  $\beta$ -actina. (B) Espressione dell'mRNA di citochine valutato mediante RT-PCR multiplex. Corsia 1, co-cultura di MS non trattati; corsia 2, co-cultura di MS trattati con Lef-M (1  $\mu$ mol/L) in combinazione con MTX (50 ng/ml); corsia 3, con Lef-M (10  $\mu$ mol/L) e MTX (50 ng/ml); corsia 4, con Lef-M (30  $\mu$ mol/L) e MTX (50 ng/ml); corsia 5, controllo positivo; corsia 6, controllo negativo; corsia 7, markers per il peso molecolare. In basso: espressione del gene housekeeping per la  $\beta$ -actina.

dell'mRNA degli inibitori di NF- $\kappa$ B è diminuita in maniera dose dipendente (figura 6). È interessante notare che, nei MS trattati con la combinazione di Lef-M e MTX, sia stata osservata l'assenza totale dell'mRNA per tutti i geni analizzati in questo studio (dati non riportati).

## DISCUSSIONE

Questo studio dimostra che l'attività pro-infiammatoria dei MS da AR è aumentata in coltura in presenza di una linea

attivata di cellule T e che l'aggiunta del metabolita attivo di Lef (A771726) esercita un effetto antinfiammatorio significativo diminuendo la produzione macrofagica di citochine pro-infiammatorie (TNF $\alpha$ , IL1 $\beta$ , IL6), della molecola di adesione ICAM-1, delle COX e l'espressione di NF- $\kappa$ B, come complesso di molecole di trascrizione che modula le risposte cellulari nelle cellule attivate.

Il trattamento di queste co-culture con la combinazione di Lef-M e MTX ha indotto un'ulteriore diminuzione

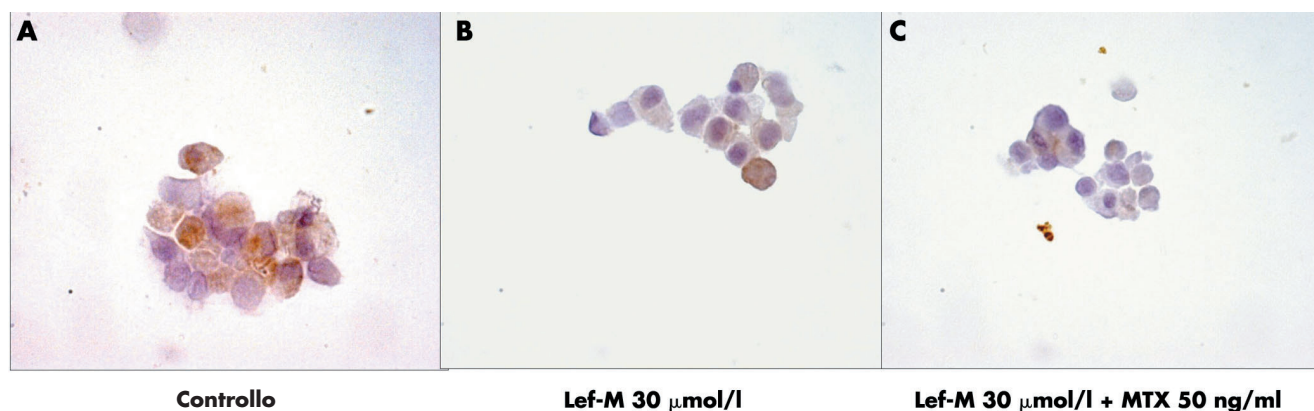

**Figura 5** Dosaggio intracitoplasmatico di ICAM-1 mediante ICC. (A) ICAM-1 in una co-cultura di MS non trattati. (B) ICAM-1 in una co-cultura di MS trattati con solo Lef-M (30 µmol/L). (C) ICAM-1 in una co-cultura di MS trattati con Lef-M (30 µmol/L) in combinazione con MTX (50 ng/ml). (ingrandimento 50×)

significativa dei mediatori infiammatori menzionati sopra, supportando l'ipotesi di una possibile azione additiva di MTX, come è stato già postulato alcuni anni or sono.<sup>22</sup> Gli effetti della combinazione Lef-M+MTX rispetto a quelli del solo Lef-M sono stati considerati particolarmente notevoli e significativi nei confronti della produzione di citochine pro-infiammatorie (TNF $\alpha$ , IL1 $\beta$  e IL6) da parte dei macrofagi attivati di pazienti con AR.

Poiché in tutti gli esperimenti di combinazione è stata usata la stessa dose di MTX (50 ng/ml), le influenze inibitorie qui riportate sono principalmente attribuibili a Lef-M, dal momento che gli effetti dose-correlati di questa molecola (1, 10, 30 µmol/L) rimangono evidenti dopo aggiunta di MTX. Inoltre, in nostri precedenti studi, non sono stati riscontrati significativi effetti antinfiammatori del solo MTX (50 ng/ml) su colture di macrofagi in corso di AR rispetto a monociti attivati; questo dato suggerisce un'azione meno potente di MTX sulle cellule differenziate (cioè i macrofagi).<sup>17, 18</sup>

I risultati di questo studio supportano fortemente un'analisi clinica recente che ha dimostrato come pazienti affetti da AR trattati con una combinazione di MTX e Lef mostrano una riduzione significativa di numerose chemochine principali, quali MCP-1 e MDC-1.<sup>19</sup> Prima di essere inclusi nello studio, questi pazienti avevano ricevuto MTX (15 mg/settimana) per non meno di 3 mesi. È stata quindi somministrata una dose da carico di 100 mg/die di Lef per 3 giorni, seguita da un dosaggio di 10 mg/die per il restante periodo di studio. Sono state inoltre trovate correlazioni positive tra riduzioni delle chemochine plasmatiche e risultati clinici.<sup>19</sup> Lo studio suggerisce che la terapia di combinazione

con Lef e MTX manifesta un'attività antinfiammatoria nella soppressione dell'espressione delle chemochine e quindi nel successivo reclutamento delle cellule infiammatorie nei siti dove si sviluppa la flogosi -in corso di AR.<sup>19</sup> Sarebbe interessante, in ulteriori studi, utilizzare un modello sperimentale che preveda co-culture di MS e linfociti da sangue periferico degli stessi pazienti con AR per valutare ulteriormente gli effetti della terapia di combinazione con Lef-M e MTX.

Numerosi studi clinici hanno recentemente confermato che la terapia di combinazione con Lef e MTX migliora le risposte cliniche in pazienti con AR attiva e che tale combinazione è sicura.<sup>13, 14, 23</sup>

I risultati del presente studio *in vitro* sembrano quindi confermare la recente osservazione del significativo ridotto numero di macrofagi - con diminuita espressione di TNF $\alpha$ , IL1 $\beta$  e ICAM-1, nei campioni di tessuto sinoviale ottenuti da pazienti con AR dopo 4 mesi di trattamento con Lef o MTX.<sup>24</sup>

Per quanto riguarda l'espressione di ICAM-1, Lef-M mediante deplezione del pool di pirimidina sembra esercitare una *down regulation* sulla glicosilazione delle molecole di adesione, riducendo ulteriormente l'attivazione del contatto cellula-cellula e l'insediamento di cellule infiammatorie durante la reazione infiammatoria.<sup>10, 25</sup> Nei pazienti artritici trattati, è stato osservato che Lef-M influenza la migrazione transendoteliale di PBMC (soprattutto monociti), inibendo la DHODH.<sup>11</sup> L'analisi fluorocitometrica delle PBMC tra la popolazione cellulare migrata ha dimostrato una diminuzione dei monociti, ma non nelle cellule B o T, dopo trattamento con Lef-M. Inoltre, l'incubazione con Lef-M delle PBMC ottenute da pazienti artritici ha ridotto anche l'attività di altre molecole di adesione cellulare, come l'espressione del CD44 e il legame PBMC-ialuronano.<sup>11</sup>

Il presente studio dimostra che la combinazione di Lef-M e MTX induce una diminuzione aggiuntiva dell'espressione di ICAM-1 nei macrofagi in co-cultura con una linea di cellule T attivate. L'ulteriore meccanismo antinfiammatorio esercitato nell'AR da entrambi i farmaci sembra quindi essere correlato anche alla riduzione nella possibile attivazione da contatto cellula-cellula.<sup>26</sup>

Recentemente, analisi con tecniche raffinate mediante risonanza magnetica con gadolinio (DRMRI) di tessuto sinoviale da pazienti con AR trattati con Lef e con MTX hanno dimostrato una riduzione significativa della reazione infiammatoria per entrambi i farmaci.<sup>27</sup>

Queste evidenze risultano connesse ai leucociti infiltrati nel tessuto infiammatorio sinoviale; viene pertanto confermato che Lef e MTX esercitano la loro attività

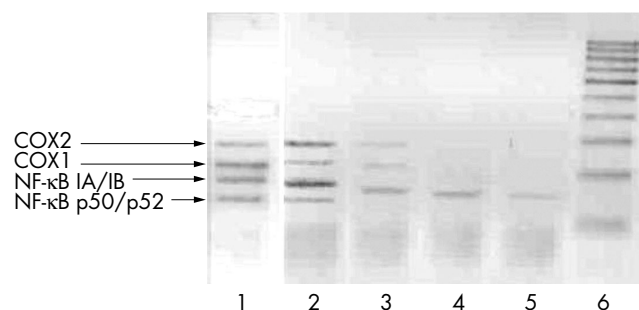

**Figura 6** Espressione degli mRNA per COX1 e COX2, per gli inibitori dell'NF- $\kappa$ B e per il complesso NF- $\kappa$ B valutati mediante RT-PCR multiplex. Corsia 1, controllo positivo; corsia 2, co-cultura di MS non trattati (controllo); corsia 3, co-cultura di MS trattati con Lef-M (1 µmol/L); corsia 4, con Lef-M (10 µmol/L); corsia 5, con Lef-M (30 µmol/L); corsia 6, markers per il peso molecolare.

antinfiammatoria soprattutto su monociti/macrofagi. Lef-M e MTX in combinazione o come singoli trattamenti hanno dimostrato effetti molto simili sui meccanismi di base dell'infiammazione.<sup>10 15 17 18 28</sup>

I risultati del presente studio supportano un effetto additivo di MTX quando viene combinato con Lef-M relativamente all'effetto antinfiammatorio sui macrofagi in co-coltura con una linea di cellule T. Tuttavia, l'esistenza di un effetto additivo o sinergico della combinazione andrebbe confermata in uno studio di confronto tra dosi diverse di ciascun farmaco, utilizzato solo o in combinazione.

La significativa diminuzione della COX2 inducibile e della COX1, riscontrata per la prima volta nel presente studio anche sull'espressione dell'mRNA, conferma precedenti osservazioni che suggeriscono un ampio effetto antinfiammatorio per Lef-M, come è stato qui dimostrato, e per MTX (dati non riportati).<sup>10 29 30</sup>

Poiché è stato dimostrato anche che Lef-M sopprime l'attivazione dell'NF-κB, potente mediatore dell'infiammazione quando stimolato da agenti pro-flogistici, il presente studio suggerisce che l'inibizione si realizza a livello dell'espressione dell'mRNA, supportando un altro importante target del meccanismo d'azione di Lef.<sup>31-33</sup>

Gli effetti più dettagliati di Lef-M e MTX (soli o in combinazione) sull'attivazione del complesso NF-κB, fosforilazione di IκB-α (ser 32) e legame del DNA di NF-κB necessitano di ulteriori studi.

In conclusione, la combinazione di MTX e Lef-M dimostra effetti inibitori additivi sulla produzione di mediatori infiammatori da parte di MS in co-coltura con una linea di cellule T. Queste osservazioni potrebbero supportare i risultati positivi ottenuti con la combinazione di entrambi, Lef e MTX, nel corso di studi clinici nell'AR e potrebbero consentire una riduzione del dosaggio dei due farmaci quando vengano somministrati in combinazione.<sup>34 35</sup>

#### Affiliazioni degli autori

**M Cutolo, S Capellino, P Montagna, A Sulli, B Serio, Laboratorio di ricerca e Divisione di Reumatologia, Dipartimento di Medicina Interna. Università degli Studi di Genova, Genova, Italia**

**B Villaggio, Laboratorio di ricerca e Divisione di Nefrologia, Dipartimento di Medicina Interna. Università degli Studi di Genova, Genova, Italia**

Questo studio è stato supportato da Aventis con una borsa per un giovane ricercatore

Conflitto di interessi: nessuno dichiarato

#### BIBLIOGRAFIA

- Hitchon CA, el-Gabalawy HS. The histopathology of early synovitis. *Clin Exp Rheumatol* 2003;**21**:S28-36.
- Ospelt C, Neidhart M, Gay RE, Gay S. Synovial activation in rheumatoid arthritis. *Front Biosci* 2004;**9**:2323-34.
- Fairbanks LD, Bofil M, Ruckerman K, Simmonds HA. Importance of ribonucleotide availability to proliferating T-lymphocytes from healthy humans. *J Biol Chem* 1995;**270**:253-79.
- Davis JP, Cain GA, Pitts WJ, Magolda RL, Copeland RA. The immunosuppressive metabolite of leflunomide is a potent inhibitor of human dihydroorotate dehydrogenase. *Biochemistry* 1996;**35**:1270-3.
- Urushibara M, Takayanagi H, Koga T, Kim S, Isobe M, Morishita Y, et al. The antirheumatic drug leflunomide inhibits osteoclastogenesis by interfering with receptor activator of NF-κappa B ligand-stimulated induction of nuclear factor of activated T cells c1. *Arthritis Rheum* 2004;**50**(3):794-804.
- Elkayam O, Yaron I, Shirazi I, Judovitch R, Caspi D, Yaron M. Active leflunomide metabolite inhibits interleukin 1beta, tumour necrosis factor alpha, nitric oxide, and metalloproteinase-3 production in activated human synovial tissue cultures. *Ann Rheum Dis* 2003;**62**(5):440-3.
- Burger D, Begue-Pastor N, Benavent S, Gruaz L, Kaufmann MT, Chicheportiche R, et al. The active metabolite of leflunomide, Lef-M, inhibits the production of prostaglandin E(2), matrix metalloproteinase 1 and interleukin 6 in human fibroblast-like synoviocytes. *Rheumatology (Oxford)* 2003;**42**(1):89-96.
- Manna SK, Mukhopadhyay A, Aggarwal BB. Leflunomide suppresses TNF-induced cellular responses: effects on NF-kappa B, activator protein-1, c-Jun N-terminal protein kinase, and apoptosis. *J Immunol* 2000;**165**(10):5962-9.
- Breedveld FC, Dayer JM. Leflunomide: mode of action in the treatment of rheumatoid arthritis. *Ann Rheum Dis* 2000;**59**(11):841-9.
- Cutolo M, Sulli A, Ghiorzo P, Pizzorni C, Craviocto C, Villaggio B. Anti-inflammatory effects of leflunomide on cultured synovial macrophages from patients with rheumatoid arthritis. *Ann Rheum Dis* 2003;**62**(4):297-302.
- Grisar J, Aringer M, Koller MD, Stummvoll GH, Eselbeck D, Zwolfer B, et al. Leflunomide inhibits transendothelial migration of peripheral blood mononuclear cells. *Ann Rheum Dis* 2004;**63**(12):1632-7.
- Kremer JM, Genovese MC, Cannon GW, Caldwell JR, Cush JJ, Furst DE, et al. Concomitant leflunomide therapy in patients with active rheumatoid arthritis despite stable doses of methotrexate. A randomized, double-blind, placebo-controlled trial. *Ann Intern Med* 2002;**137**(9):726-33.
- Kremer J, Genovese M, Cannon GW, Caldwell J, Cush J, Furst DE, et al. Combination leflunomide and methotrexate (MTX) therapy for patients with active rheumatoid arthritis failing MTX monotherapy: open-label extension of a randomized, double-blind, placebo controlled trial. *J Rheumatol* 2004;**31**(8):1521-31.
- Van Riel P. Leflunomide improves the clinical response in patients with active rheumatoid arthritis treated with methotrexate. *Clin Exp Rheumatol* 2003;**21**(6):695-6.
- Cutolo M, Sulli A, Pizzorni C, Serio B, Straub RH. Anti-inflammatory mechanisms of methotrexate in rheumatoid arthritis. *Ann Rheum Dis* 2001;**60**(8):729-35.
- Cronstein BN. The mechanism of action of methotrexate. *Rheum Dis Clin North Am* 1997;**23**(4):739-5.
- Cutolo M, Sulli A, Craviocto C, Felli L, Pizzorni C, Serio B, et al. Antiproliferative-antiinflammatory effects of methotrexate and sex hormones on cultured differentiating myeloid monocytic cells (THP-1). *Ann N Y Acad Sci* 2002;**966**:232-7.
- Cutolo M, Bisso A, Sulli A, Felli L, Briata M, Pizzorni C, et al. Antiproliferative and antiinflammatory effects of methotrexate on cultured differentiating myeloid monocytic cells (THP-1) but not on synovial macrophages from patients with rheumatoid arthritis. *J Rheumatol* 2000;**27**(11):2551-7.
- Ho CY, Wong CK, Li EK, Tam LS, Lam CW. Suppressive effect of combination treatment of leflunomide and methotrexate on chemokine expression in patients with rheumatoid arthritis. *Clin Exp Immunol* 2003;**133**(1):132-8.
- Bacher S, Schmitz ML. The NF-kappaB pathway as a potential target for autoimmune disease therapy. *Curr Pharm Des* 2004;**10**(23):2827-37.
- Arnett FC, Edworthy SM, Bloch DA, McShane DJ, Fries JF, Cooper NS, et al. The American Rheumatism Association 1987 revised criteria for the classification of rheumatoid arthritis. *Arthritis Rheum* 1988;**31**(3):315-2.
- Kremer JM. Methotrexate and leflunomide: biochemical basis for combination therapy in the treatment of rheumatoid arthritis. *Semin Arthritis Rheum* 1999;**29**(1):14-26.
- Weinblatt ME, Kremer JM, Coblyn JS, Maier AL, Helfgott SM, Morrell M, et al. Pharmacokinetics, safety, and efficacy of combination treatment with methotrexate and leflunomide in patients with active rheumatoid arthritis. *Arthritis Rheum* 1999;**42**(7):1322-8.
- Kraan MC, Reece RJ, Barg EC, Smeets TJM, Farnell J, Rosenberg R, et al. Modulation of inflammation and metalloproteinase expression in synovial tissue by leflunomide and methotrexate in patients with active rheumatoid arthritis. *Arthritis Rheum* 2000;**4**:1820-30.
- Elder RT, Xu X, Gong H, Finnegan A, Chong ASF. The immunosuppressive metabolite of leflunomide, A771726, affects murine T cells through two biochemical mechanisms. *J Immunol* 1997;**159**:22-7.
- Dimitrijevic M, Bartlett RR. Leflunomide, a novel immunomodulating drug, inhibits homotypic adhesion of mononuclear cells in rheumatoid arthritis. *Transplant Proc* 1996;**28**:3086.
- Reece RJ, Kraan MC, Radjenovic A, Veale DJ, O'Connor PJ, Ridgway JP, et al. Comparative assessment of leflunomide and methotrexate for the treatment of rheumatoid arthritis, by dynamic enhanced magnetic resonance imaging. *Arthritis Rheum* 2002;**46**:366-72.
- Smith MD, Kraan MC, Slavotinek J, Au V, Weedon H, Parker A, et al. Treatment-induced remission in rheumatoid arthritis patients is characterized by a reduction in macrophage content of synovial biopsies. *Rheumatology (Oxford)* 2001;**40**:367-74.
- Halminton LC, Vojnovic I, Warner TD. A771726, the active metabolite of leflunomide, directly inhibits activity of cyclo-oxygenase-2 in vitro and in vivo in a substrate-sensitive manner. *Br J Pharmacol* 1999;**127**:1589-96.
- Weithmann KU, Jeske S, Schlotte V. Effects of leflunomide on constitutive and inducible pathways of cellular eicosanoid generation. *Agents Actions* 1994;**41**(3-4):164-70.
- Manna SK, Aggarwal BB. Immunosuppressive leflunomide metabolite (A771726) blocks TNF-dependent nuclear factor-κB activation and gene expression. *J Immunol* 1999;**162**:2095.
- Manna SK, Mukhopadhyay A, Aggarwal BB. Leflunomide suppresses TNF-induced cellular response: effects on NF-κB, activator protein-1, c-Jun, N-terminal protein kinase and apoptosis. *J Immunol* 2000;**165**:5962-9.
- Fairbanks LD, Bofil M, Ruckemann K, Simmonds HA. Importance of ribonucleotide availability to proliferating T-lymphocytes from healthy humans. Disproportionate expansion of pyrimidine pools and contrasting effects of de novo synthesis inhibition. *J Biol Chem* 1995;**270**:29682-9.
- Kalden JR, Smolen JS, Emery P, van Riel PL, Dougados M, Strand CV, et al. Leflunomide in combination therapy. *J Rheumatol Suppl* 2004;**71**:25-30.
- Dayer JM, Cutolo M. Is there a rationale to using leflunomide in early rheumatoid arthritis? *Clin Exp Rheumatol* 2005;**23**:404-12.
